# Supplementary material for: Obesity and health service utilization in Brazil: data from the National Health Survey
Source: Springer Nature journal article supplement (doi:10.1186/s12889-022-13906-2), 2022-08-02
Supplement: MOESM1 [file 23328944]

**Supplementary material.** Health service use according to type, BMI and sex (n = 59,402). PNS, Brazil, 2013.

| Type of health service used by sex                                                   | BMI Categories <sup>1</sup> |           |               |                |             |                |             |                |             |                 |             |                 |
|--------------------------------------------------------------------------------------|-----------------------------|-----------|---------------|----------------|-------------|----------------|-------------|----------------|-------------|-----------------|-------------|-----------------|
|                                                                                      | Underweight                 |           | Normal weight |                | Overweight  |                | Obesity I   |                | Obesity II  |                 | Obesity III |                 |
|                                                                                      | %                           | 95%CI     | %             | 95%CI          | %           | 95%CI          | %           | 95%CI          | %           | 95%CI           | %           | 95%CI           |
| <b>Routine visits to doctor or health service for SAH</b>                            | <b>5.3</b>                  | 3.4-7.1   | <b>7.3</b>    | 6.7-7.9        | <b>13.7</b> | 12.9-14.6      | <b>20.1</b> | 18.7-21.6      | <b>28.3</b> | 25.2-31.4       | <b>30.6</b> | 25.5-35.7       |
| Male                                                                                 | <b>3.1</b>                  | 1.0-5.1   | <b>6.1</b>    | 5.4-6.8        | <b>10.7</b> | 10.0-11.8      | <b>17.0</b> | 14.7-19.4      | <b>22.0</b> | 16.5-27.6       | <b>29.2</b> | 18.8-39.6       |
| Female                                                                               | <b>6.7</b>                  | 4.0-9.4   | <b>8.4</b>    | 7.5-9.3        | <b>16.8</b> | 15.6-18.1      | <b>22.3</b> | 20.5-24.0      | <b>31.6</b> | 28.1-35.2       | <b>31.0</b> | 25.2-36.9       |
| <b>Routine visits to doctor or health service for DM</b>                             | <b>2.4</b>                  | 0.9-3.8   | <b>2.3</b>    | 2.0-2.6        | <b>4.6</b>  | 4.1-5.1        | <b>6.9</b>  | 6.0-7.7        | <b>8.3</b>  | 6.6-9.9         | <b>11.1</b> | 7.5-14.7        |
| Male                                                                                 | <b>2.9</b>                  | 0.0-5.9   | <b>2.1</b>    | 1.6-2.6        | <b>3.6</b>  | 2.8-4.3        | <b>6.2</b>  | 4.9-7.6        | <b>6.8</b>  | 3.6-10.0        | <b>10.4</b> | 2.3-18.4        |
| Female                                                                               | <b>2.0</b>                  | 0.7-3.3   | <b>2.5</b>    | 2.1-3.0        | <b>5.7</b>  | 4.9-6.4        | <b>7.3</b>  | 6.1-8.4        | <b>9.0</b>  | 7.1-11.0        | <b>11.3</b> | 7.4-15.3        |
| <b>Routine visits to doctor or health service (individuals with SAH and DM)*</b>     | <b>2.4</b>                  | 1.0-3.8   | <b>2.5</b>    | 2.2-2.8        | <b>5.1</b>  | 4.5-5.6        | <b>7.8</b>  | 6.9-8.7        | <b>10.3</b> | 8.2-12.4        | <b>12.9</b> | 9.2-16.6        |
| Male                                                                                 | <b>2.9</b>                  | -0.05-5.9 | <b>2.2</b>    | 1.7-2.7        | <b>3.9</b>  | 3.2-4.7        | <b>6.8</b>  | 5.3-8.2        | <b>7.8</b>  | 4.5-11.1        | <b>11.8</b> | 3.7-19.8        |
| Female                                                                               | <b>2.0</b>                  | 0.7-3.3   | <b>2.7</b>    | 2.3-3.2        | <b>6.3</b>  | 5.5-7.1        | <b>8.5</b>  | 7.3-9.8        | <b>11.7</b> | 9.0-14.4        | <b>13.2</b> | 9.1-17.4        |
| <b>Exams done for SAH</b>                                                            | <b>6.0</b>                  | 4.1-7.9   | <b>8.8</b>    | 8.2-9.5        | <b>15.9</b> | 15.1-16.8      | <b>24.0</b> | 22.5-25.6      | <b>29.2</b> | 26.0-32.4       | <b>37.1</b> | 32.0-42.3       |
| Male                                                                                 | <b>3.4</b>                  | 1.4-5.4   | <b>8.1</b>    | 7.2-8.9        | <b>12.8</b> | 11.7-13.9      | <b>21.9</b> | 19.5-24.3      | <b>27.8</b> | 21.5-34.1       | <b>36.6</b> | 25.8-47.5       |
| Female                                                                               | <b>7.7</b>                  | 4.9-10.6  | <b>9.6</b>    | 8.7-10.4       | <b>19.1</b> | 17.8-20.4      | <b>25.5</b> | 23.5-27.5      | <b>30.0</b> | 26.5-33.4       | <b>37.3</b> | 31.4-43.2       |
| <b>Exams done for DM</b>                                                             | <b>2.5</b>                  | 1.1-3.9   | <b>2.8</b>    | 2.4-3.1        | <b>5.2</b>  | 4.7-5.8        | <b>8.0</b>  | 7.1-9.0        | <b>8.6</b>  | 6.7-10.5        | <b>11.2</b> | 7.8-14.7        |
| Male                                                                                 | <b>3.3</b>                  | 0.3-6.3   | <b>2.7</b>    | 2.2-3.3        | <b>4.4</b>  | 3.6-5.2        | <b>7.8</b>  | 6.3-9.3        | <b>7.9</b>  | 4.7-11.1        | <b>11.5</b> | 3.4-19.6        |
| Female                                                                               | <b>2.0</b>                  | 0.7-3.2   | <b>2.8</b>    | 2.4-3.3        | <b>6.1</b>  | 5.3-6.8        | <b>8.2</b>  | 7.0-9.4        | <b>8.9</b>  | 6.8-11.0        | <b>11.2</b> | 7.4-15.0        |
| <b>Exams done (individuals with SAH and DM)*</b>                                     | <b>2.8</b>                  | 1.4-4.3   | <b>3.0</b>    | <b>2.6-3.3</b> | <b>5.7</b>  | <b>5.1-6.3</b> | <b>8.7</b>  | <b>7.7-9.6</b> | <b>9.8</b>  | <b>7.8-11.9</b> | <b>12.9</b> | <b>9.3-16.6</b> |
| Male                                                                                 | <b>3.4</b>                  | 0.4-6.4   | <b>2.9</b>    | 2.3-3.4        | <b>4.6</b>  | 3.8-5.5        | <b>8.4</b>  | 6.9-9.9        | <b>9.0</b>  | 5.7-12.4        | <b>12.4</b> | 4.3-20.5        |
| Female                                                                               | <b>2.4</b>                  | 1.0-3.8   | <b>3.1</b>    | 2.6-3.6        | <b>6.8</b>  | 6.0-7.8        | <b>8.8</b>  | 7.6-10.1       | <b>10.3</b> | 7.9-12.6        | <b>13.1</b> | 9.1-17.1        |
| <b>Referral to specialist for SAH (includes consultation)</b>                        | <b>2.4</b>                  | 0.9-4.0   | <b>2.7</b>    | 2.3-3.0        | <b>5.4</b>  | 4.8-6.0        | <b>7.1</b>  | 6.2-8.0        | <b>8.3</b>  | 6.7-9.9         | <b>10.9</b> | 7.6-14.2        |
| Male                                                                                 | <b>1.4</b>                  | -0.2-3.1  | <b>2.6</b>    | 2.1-3.0        | <b>4.6</b>  | 3.7-5.4        | <b>7.0</b>  | 5.4-8.6        | <b>6.8</b>  | 4.1-9.5         | <b>14.6</b> | 5.7-23.6        |
| Female                                                                               | <b>3.1</b>                  | 0.8-5.4   | <b>2.8</b>    | 2.3-3.3        | <b>6.2</b>  | 5.3-7.0        | <b>7.2</b>  | 6.2-8.3        | <b>9.0</b>  | 7.1-11.0        | <b>9.8</b>  | 6.4-13.1        |
| <b>Referral to specialist for DM (includes consultation)</b>                         | <b>1.0</b>                  | -1.6-2.2  | <b>0.7</b>    | 0.5-0.8        | <b>1.6</b>  | 1.2-1.9        | <b>1.8</b>  | 1.3-2.2        | <b>2.7</b>  | 1.7-3.7         | <b>3.4</b>  | 1.7-5.2         |
| Male                                                                                 | <b>1.9</b>                  | -0.9-4.8  | <b>0.6</b>    | 0.4-0.9        | <b>1.5</b>  | 1.0-2.0        | <b>1.6</b>  | 0.9-2.2        | <b>3.3</b>  | 1.1-5.5         | <b>1.4</b>  | -0.4-3.4        |
| Female                                                                               | <b>0.4</b>                  | 0.0-0.9   | <b>0.7</b>    | 0.4-1.0        | <b>1.6</b>  | 1.2-2.1        | <b>1.9</b>  | 1.3-2.5        | <b>2.4</b>  | 1.4-3.4         | <b>4.1</b>  | 1.8-6.3         |
| <b>Referral to specialist (includes consultation) (individuals with SAH and DM)*</b> | <b>1.8</b>                  | 0.5-3.1   | <b>1.8</b>    | 1.6-2.1        | <b>4.0</b>  | 3.5-4.5        | <b>6.1</b>  | 5.3-7.0        | <b>7.2</b>  | 5.7-8.8         | <b>8.3</b>  | 5.9-10.8        |
| Male                                                                                 | <b>2.8</b>                  | -0.2-5.8  | <b>2.0</b>    | 1.6-2.5        | <b>3.2</b>  | 2.6-3.9        | <b>5.8</b>  | 4.4-7.1        | <b>6.8</b>  | 3.9-9.6         | <b>5.8</b>  | 2.0-9.5         |
| Female                                                                               | <b>1.1</b>                  | 0.3-2.0   | <b>1.7</b>    | 1.3-2.1        | <b>4.7</b>  | 4.0-5.5        | <b>6.4</b>  | 5.3-7.5        | <b>7.5</b>  | 5.6-9.4         | <b>9.1</b>  | 6.1-12.1        |
| <b>Hospitalization for SAH</b>                                                       | <b>1.3</b>                  | 0.4-2.2   | <b>1.7</b>    | 1.4-1.9        | <b>3.0</b>  | 2.6-3.5        | <b>5.0</b>  | 4.3-5.8        | <b>6.6</b>  | 4.9-8.4         | <b>9.0</b>  | 5.4-12.6        |
| Male                                                                                 | <b>1.4</b>                  | -2.7-3.1  | <b>1.4</b>    | 1.1-1.8        | <b>2.3</b>  | 1.7-2.8        | <b>3.9</b>  | 2.8-5.1        | <b>6.2</b>  | 2.5-10.0        | <b>8.6</b>  | 0.3-16.9        |
| Female                                                                               | <b>1.3</b>                  | 0.3-2.3   | <b>1.9</b>    | 1.5-2.3        | <b>3.8</b>  | 3.2-4.4        | <b>5.8</b>  | 4.8-6.8        | <b>6.8</b>  | 5.0-8.7         | <b>9.1</b>  | 5.2-13.0        |

|                                                       |            |           |            |         |            |         |            |         |            |         |            |           |
|-------------------------------------------------------|------------|-----------|------------|---------|------------|---------|------------|---------|------------|---------|------------|-----------|
| <b>Hospitalization for DM</b>                         | <b>1.2</b> | 0.0-2.4   | <b>0.6</b> | 0.4-0.7 | <b>0.8</b> | 0.6-1.0 | <b>1.4</b> | 1.0-1.9 | <b>1.4</b> | 0.6-2.2 | <b>0.8</b> | 0.3-1.3   |
| Male                                                  | <b>2.0</b> | 0.9-4.8   | <b>0.6</b> | 0.4-0.8 | <b>0.7</b> | 0.4-1.0 | <b>1.6</b> | 0.8-2.4 | <b>0.8</b> | 0.0-1.7 | <b>0.5</b> | -0.4-1.4  |
| Female                                                | <b>0.6</b> | 0.0-1.4   | <b>0.5</b> | 0.4-0.7 | <b>0.9</b> | 0.6-1.2 | <b>1.3</b> | 0.7-1.9 | <b>1.7</b> | 0.6-2.8 | <b>0.9</b> | 0.3-1.5   |
| <b>Hospitalization (individuals with SAH and DM)*</b> | <b>1.2</b> | -0.04-2.4 | <b>0.7</b> | 0.6-0.9 | <b>1.5</b> | 1.2-1.7 | <b>2.5</b> | 1.9-3.1 | <b>3.5</b> | 2.0-4.9 | <b>4.2</b> | 1.9-6.6   |
| Male                                                  | <b>2.0</b> | -0.9-4.8  | <b>0.7</b> | 0.5-0.9 | <b>0.9</b> | 0.6-1.3 | <b>2.4</b> | 1.4-3.4 | <b>2.0</b> | 0.5-3.5 | <b>1.4</b> | -0.07-2.9 |
| Female                                                | <b>0.6</b> | -0.05-1.4 | <b>0.8</b> | 0.6-1.0 | <b>2.0</b> | 1.5-2.4 | <b>2.6</b> | 1.9-3.3 | <b>4.2</b> | 2.2-6.2 | <b>5.1</b> | 2.1-8.1   |

\*Utilization of the service for at least one of the diseases.

<sup>1</sup>Underweight: BMI < 18.5 Kg/m<sup>2</sup> / Normal weight: BMI = 18.5 - 24.9 Kg/m<sup>2</sup> / Overweight: BMI = 25.0 - 29.9 Kg/m<sup>2</sup> / Obesity I: BMI = 30.0 - 34.5 Kg/m<sup>2</sup> /

Obesity II: BMI = 35.0 - 39.9 Kg/m<sup>2</sup> / Obesity III: BMI ≥ 40 Kg/m<sup>2</sup>

95%CI = 95% Confidence Interval / SAH = Systemic Arterial Hypertension / DM = Diabetes Mellitus
